# Supplementary material for: Copper(I) Complexes of Mesoionic Carbene: Structural Characterization and Catalytic Hydrosilylation Reactions
Source: MDPI journal article supplement (doi:10.3390/molecules20047379), 2015-04-22
Supplement: s1 [file s1]

## Supplementary Materials

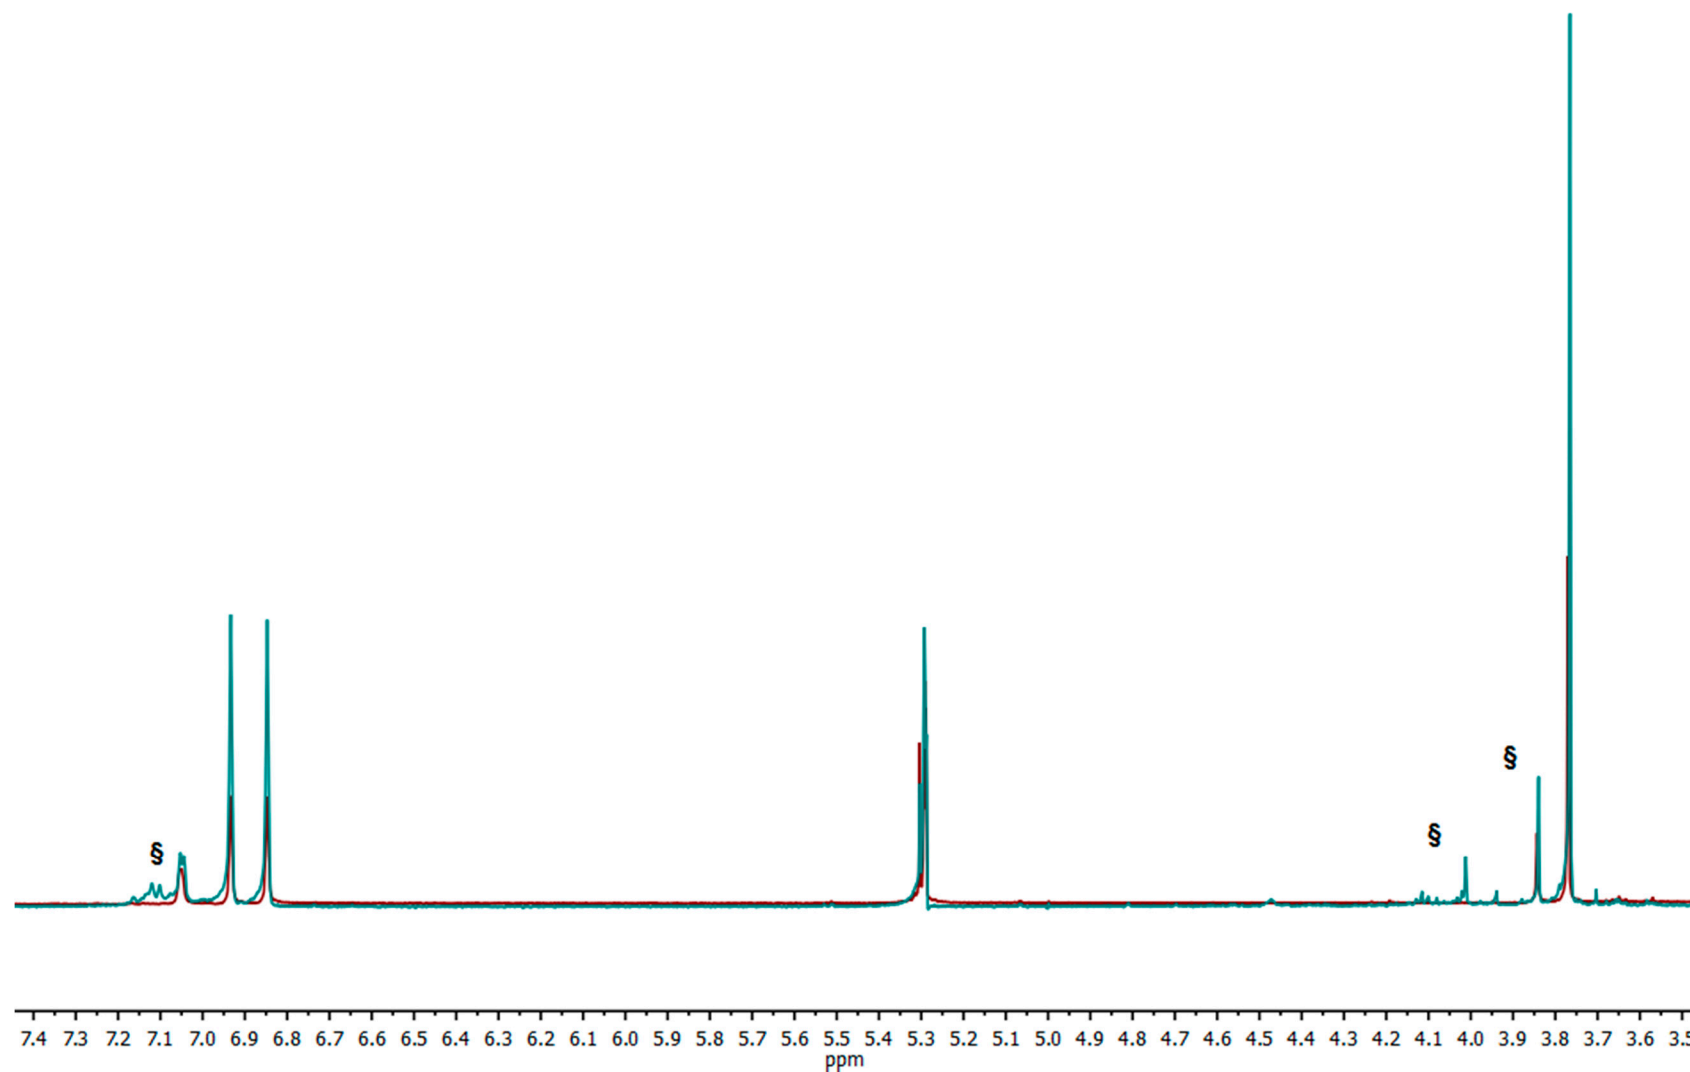

**Figure S1.** Superimposed  $^1\text{H}$ -NMR spectra of **2a** (red line) and **2a** (blue line); § indicates small decomposition byproducts.

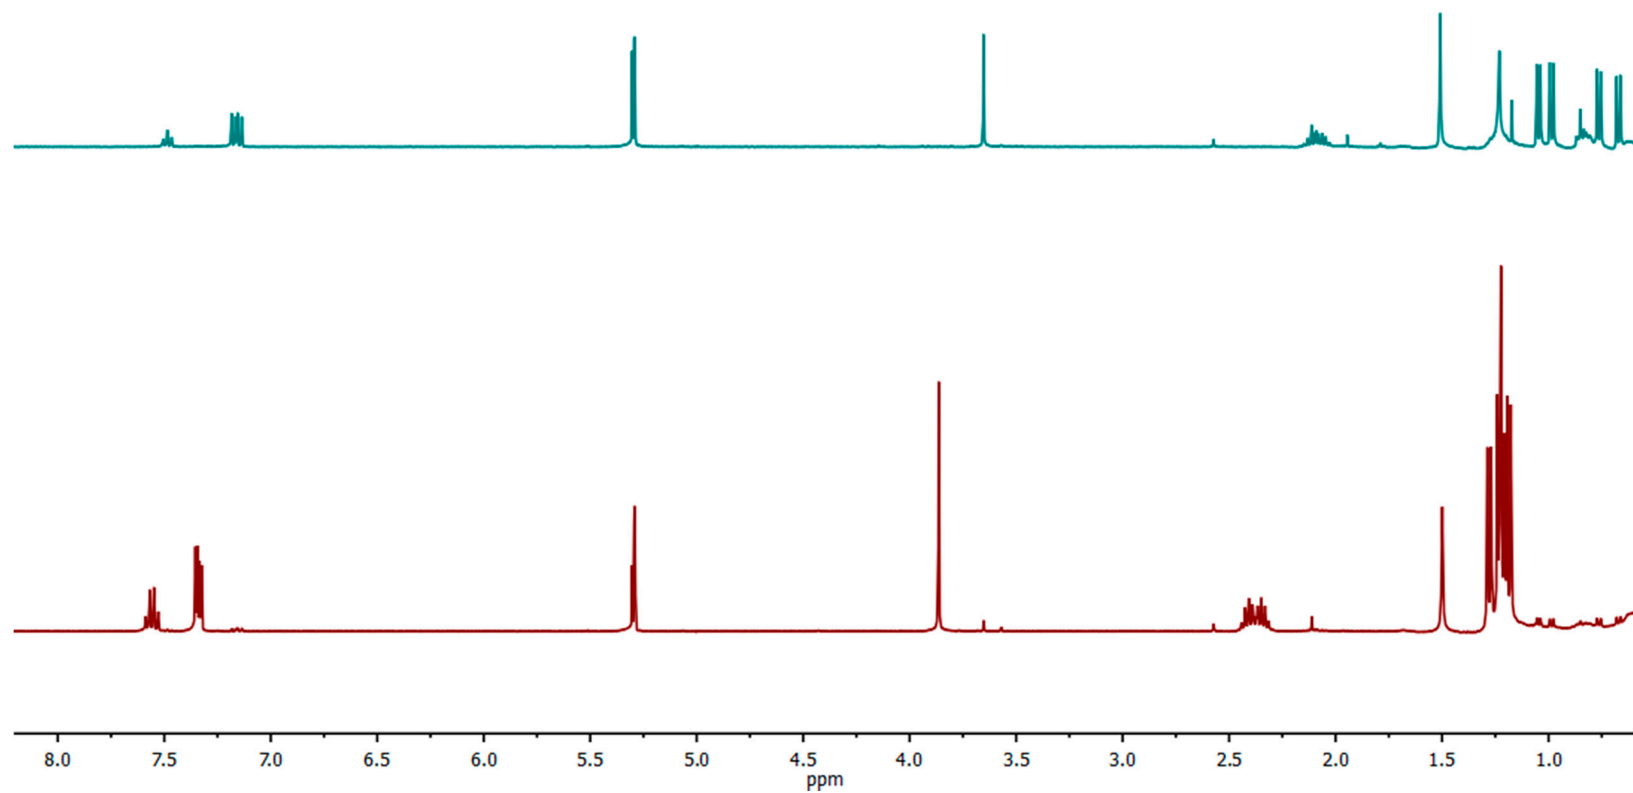

**Figure S2.** Stacked  $^1\text{H}$ -NMR spectra of **1b** (red line) and **2b** (blue line).

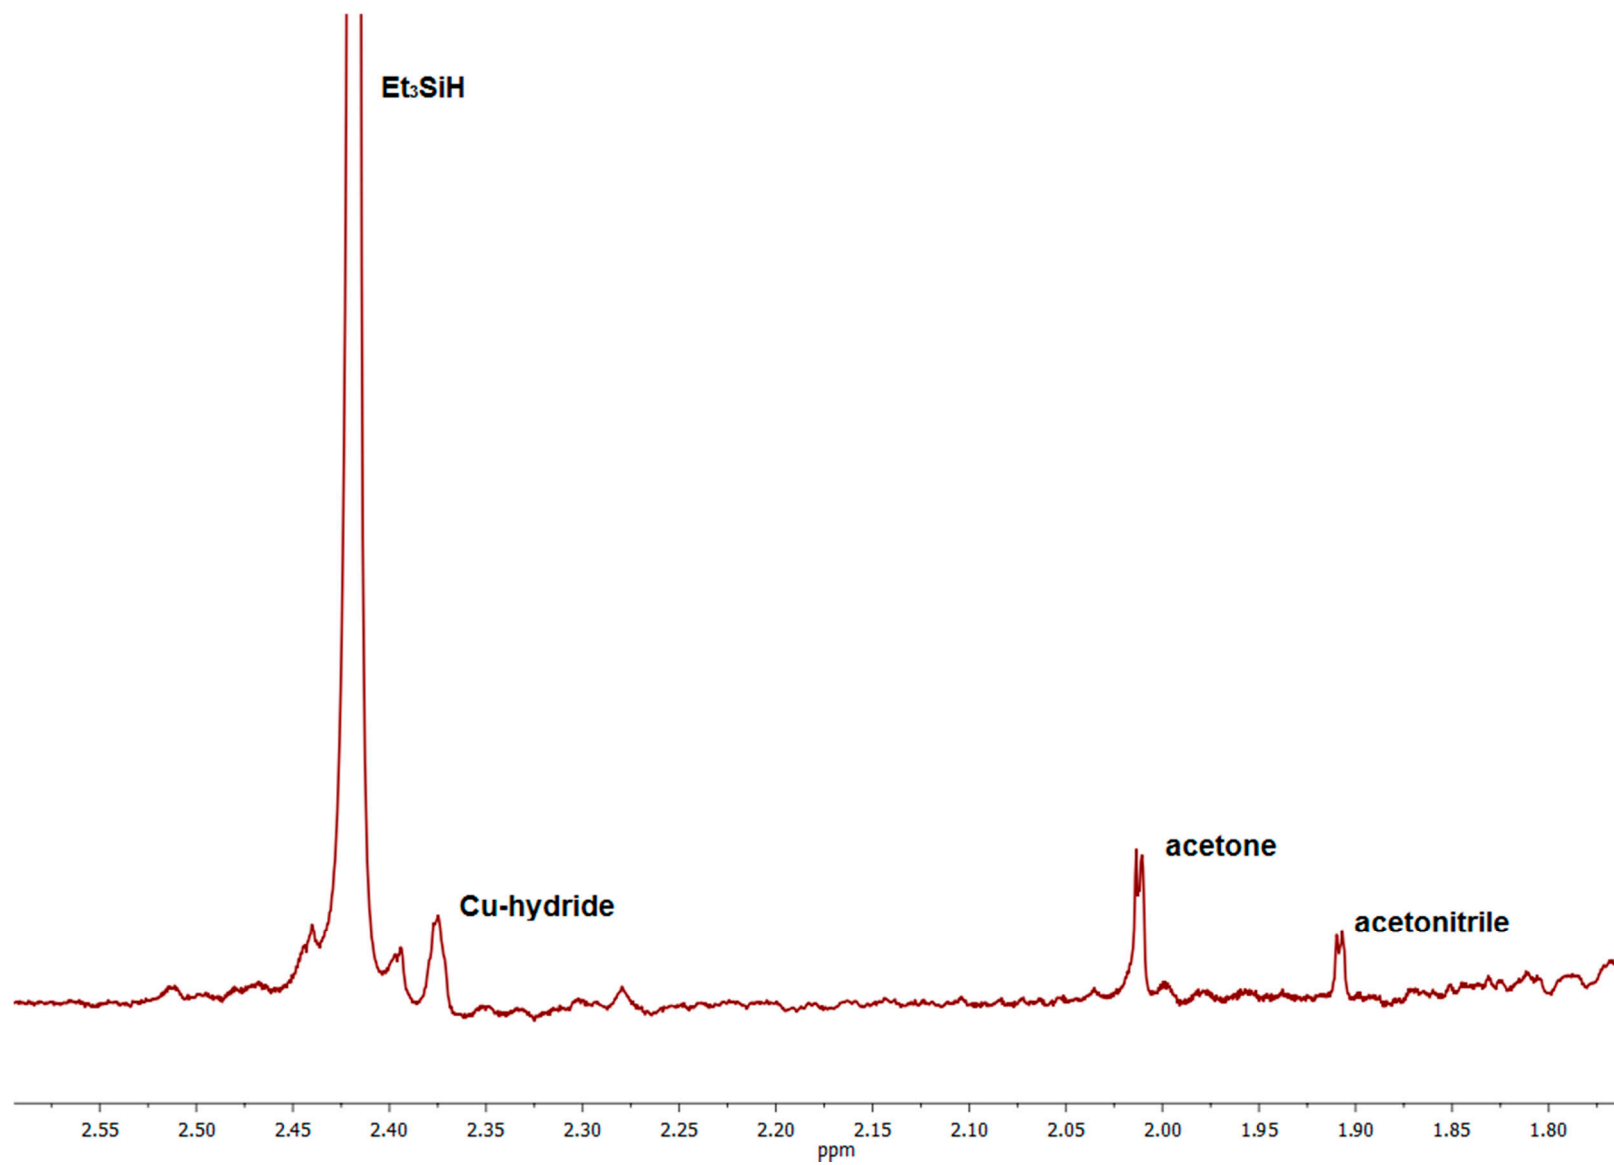

**Figure S3.** Potential hydride signal from the reaction of **1c** with Et<sub>3</sub>SiH.
